# Supplementary material for: Sortilin enhances secretion of apolipoprotein(a) through effects on apolipoprotein B secretion and promotes uptake of lipoprotein(a)
Source: PubMed Central journal article supplement — J Lipid Res. 2022 Apr 22;63(6):100216. doi: 10.1016/j.jlr.2022.100216 (PMC9131257; doi:10.1016/j.jlr.2022.100216), 2022-04-22
Supplement: mmc1.pdf [file mmc1.pdf]

## Supplementary Data

### **Sortilin enhances secretion of apolipoprotein(a) through effects on apolipoprotein B secretion and promotes uptake of lipoprotein(a)**

Justin R. Clark, Matthew Gemin, Amer Youssef, Santica M. Marcovina, Annik Prat, Nabil G. Seidah, Robert A. Hegele, Michael B. Boffa, and Marlys L. Koschinsky

**Table S1. Primers used in constructing sortilin expression plasmids<sup>a</sup>**

| <b>Trafficking Mutants</b>  | <b>Primer Sequence</b>                                              |
|-----------------------------|---------------------------------------------------------------------|
| <i>SORT1</i> -Y792A         | 5'-GTT CCT GGT GCA TCG <u>AGC</u> CTC TGT GCT GCA GCA G-3'          |
| <i>SORT1</i> -L829A/L830A   | 5'-GAT GAC TCA GAT GAG GAC <u>GCC GCG</u> GAA CCT CGA GGT CAC CC-3' |
| <b>Polymorphic Variants</b> |                                                                     |
| <i>SORT1</i> -I124V         | 5'-CACTGGGGTC <u>GTT</u> CTAGTCTTG-3'                               |
| <i>SORT1</i> -K205N         | 5'-ATTTTGC <u>GAAT</u> AATTTTGTGCAAAC-3'                            |
| <i>SORT1</i> -K302E         | 5'-TATTGGTGTG <u>GAA</u> ATCTACTCATTTG-3'                           |
| <i>SORT1</i> -F404Y         | 5'-GAGACGGACT <u>AT</u> ACCAACGTG-3'                                |
| <i>SORT1</i> -E444Q         | 5'-GAGGAAGCCT <u>CAA</u> AACAGTGAATGTG-3'                           |
| <i>SORT1</i> -E447G         | 5'-GAAAACAGT <u>GG</u> ATGTGATGCTACAGC-3'                           |
| <i>SORT1</i> -V650M         | 5'-CAAGTCATCC <u>ATG</u> TGTCAGAATGG-3'                             |

<sup>a</sup>Sense strand sequences only are shown. Mutated codons are double underlined; mutated nucleotides are in boldface type. The 5'-end of the antisense primer was designed at the base next to the 5'-end of the sense primer, and preceded in the opposite direction on the complementary strand.

**Table S2. *SORT1* rare nonsynonymous missense and splicing variants identified among individuals with Lp(a) >30 mg/dL**

| cDNA variation: amino acid change or splice site change | Chromosome 1 position | Reference allele | Alternate allele | Variant type      |
|---------------------------------------------------------|-----------------------|------------------|------------------|-------------------|
| <i>SORT1</i> exon 1: c.C10T:p.P4S                       | 1:109940505           | G                | A                | nonsynonymous SNV |
| <i>SORT1</i> exon 1: c.C145G:p.R49G                     | 1:109940370           | G                | C                | nonsynonymous SNV |
| <i>SORT1</i> exon 1: c.G28T:p.G10C                      | 1:109940487           | C                | A                | nonsynonymous SNV |
| <i>SORT1</i> exon 3: c.307-11T>-                        | 1:109912222           | A                | -                | splicing          |
| <i>SORT1</i> exon 3: c.A370G:p.I124V†                   | 1:109910100           | T                | C                | nonsynonymous SNV |
| <i>SORT1</i> exon 3: c.G381C:p.L127F                    | 1:109910089           | C                | G                | nonsynonymous SNV |
| <i>SORT1</i> exon 5: c.G615T:p.K205N†                   | 1:109897082           | C                | A                | nonsynonymous SNV |
| <i>SORT1</i> exon 8: c.A904G:p.K302E†                   | 1:109888432           | T                | C                | nonsynonymous SNV |
| <i>SORT1</i> exon 9: c.G1072T:p.D358Y                   | 1:109884672           | C                | A                | nonsynonymous SNV |
| <i>SORT1</i> exon 10: c.T1211A:p.F404Y†                 | 1:109883399           | A                | T                | nonsynonymous SNV |
| <i>SORT1</i> exon 11: c.A1340G:p.E447G†                 | 1:109878893           | T                | C                | nonsynonymous SNV |
| <i>SORT1</i> exon 11: c.G1330C:p.E444Q†                 | 1:109878903           | C                | G                | nonsynonymous SNV |
| <i>SORT1</i> exon 14: c.C1682T:p.T561M                  | 1:109867673           | G                | A                | nonsynonymous SNV |
| <i>SORT1</i> exon 14: c.1475-4G>T                       | 1:109869786           | C                | A                | splicing          |
| <i>SORT1</i> exon 15:<br>c.G1948A:p.V650M†              | 1:109865630           | C                | T                | nonsynonymous SNV |
| <i>SORT1</i> exon 17: c.2025-7C>G                       | 1:109860598           | G                | C                | splicing          |

Reference gene sequence for *SORT1* is NM\_002959. All variants have minor allele frequency <0.01.

Chromosome 1 position based on human genome build hg38.

Abbreviations: cDNA, coding DNA; SNV, single nucleotide variant

†identified in subjects with Lp(a) levels in 95<sup>th</sup> percentile

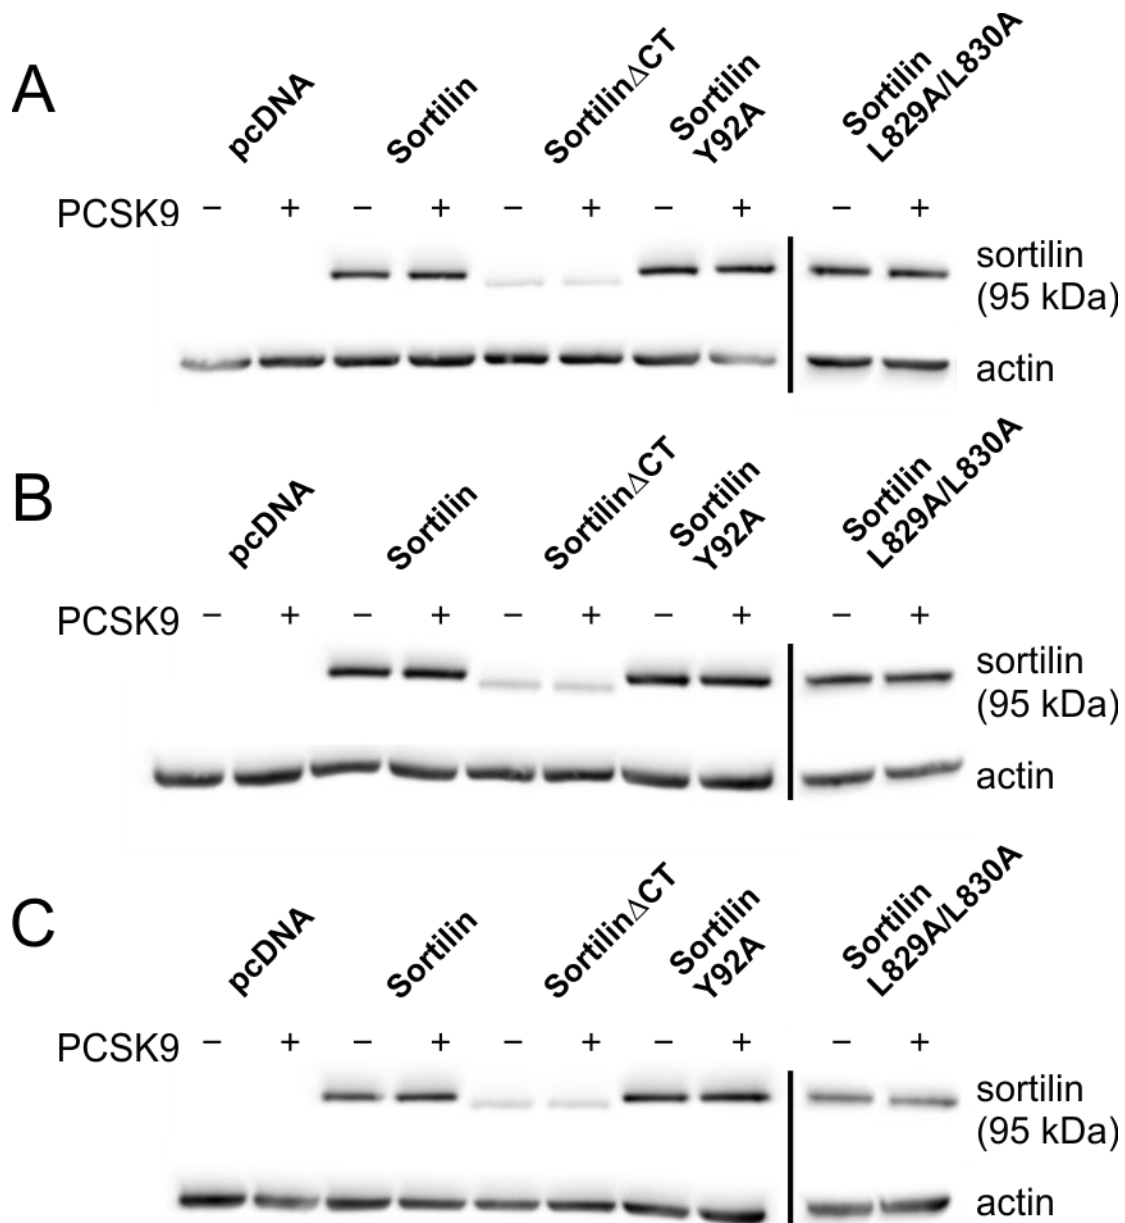

**Figure S1. Expression of sortilin trafficking variants.** HepG2 cells were transiently transfected with expression plasmids encoding the indicated variants or the empty expression plasmid pcDNA. All variants contained a carboxyl-terminal myc tag. Lysates were prepared after 24 incubation with 17K apo(a) (200 nM) (A) or Lp(a) (10  $\mu$ g/mL) (B,C) in the presence or absence of 20  $\mu$ g/mL PCSK9. Lysates were prepared and subjected to western blot analysis with mouse-anti-human c-Myc epitope tag antibodies to visualize ectopically expressed sortilin or mouse anti-human actin antibodies. Note that these expression patterns are also representative of observations in pulse-chase secretion experiments.

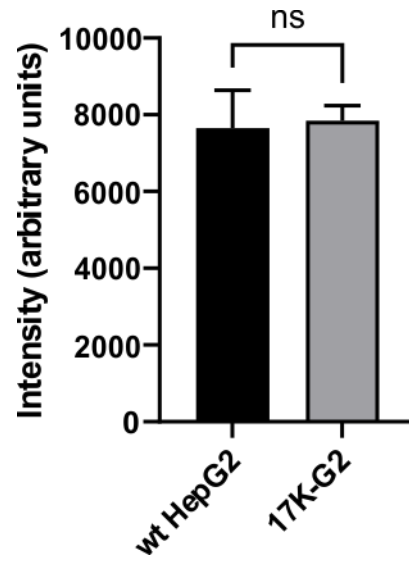

**Figure S2. Expression of apoB in HepG2 cells or 17K-HepG2 cells.** Cells were incubated for 1 hour in the presence of 0.4 mM oleic acid. Medium samples were subjected to western blot analysis using a goat polyclonal anti-apoB antibody (1:5000 dilution). ApoB expression was quantified by densitometric analysis of the blots. The data shown are the means  $\pm$  standard deviation of 3 independent medium preparations for each cell line. ns: non-significant ( $p > 0.05$  by unpaired Student's t-test).

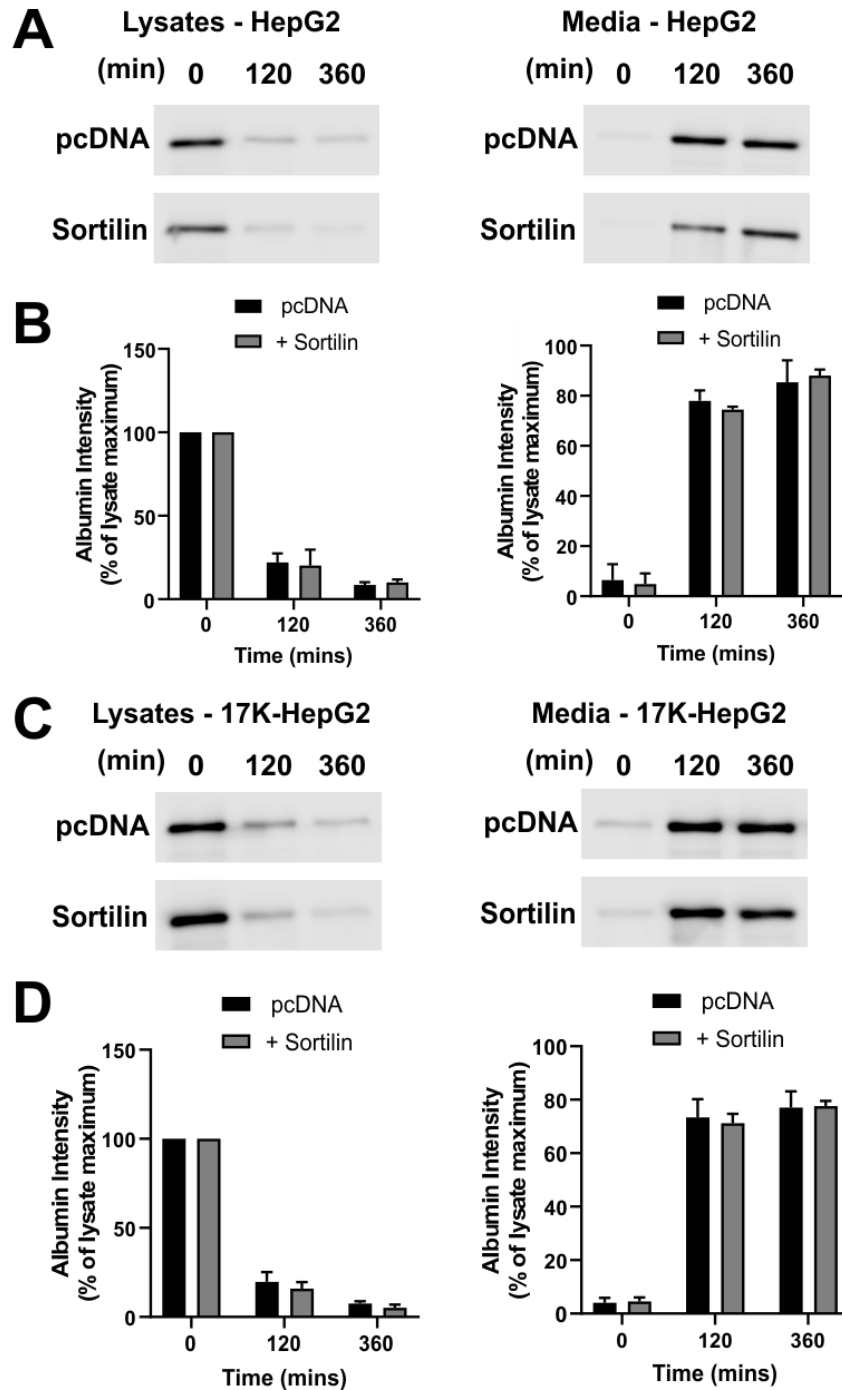

**Figure S3. Sortilin overexpression does not affect secretion of albumin from hepatocytes.** Wild-type HepG2 cells (A,B) or HepG2 cells stably expressing 17K-apo(a) (C,D) were transiently transfected with an expression vector encoding sortilin or the corresponding empty vector (pcDNA). The cells were subjected to a pulse-chase protocol followed by immunoprecipitation of lysate and medium samples using an anti-albumin antibody. Representative fluorographs (A,C) and the results of densitometric analysis (B,D) are shown; the latter are the means  $\pm$  SEM of 3 independent experiments. No significant differences between pcDNA and sortilin expression plasmid at any time were observed.

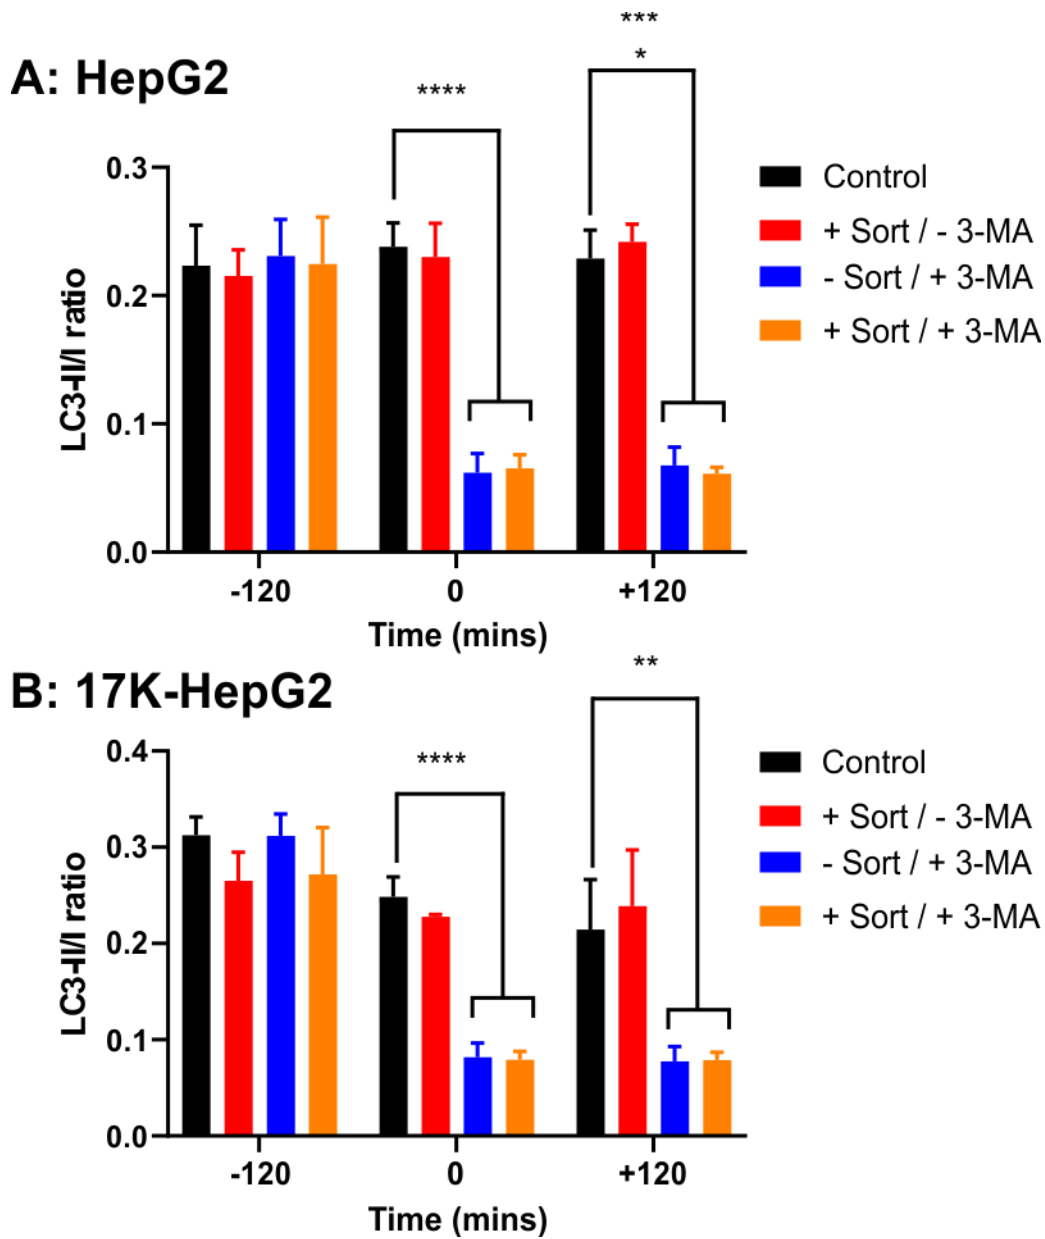

**Figure S4. Inhibition of autophagy by treatment with 3-MA.** Western blot analysis of LC3 expression in HepG2 (A) and 17K-HepG2 (B) cell lysates incubated in the presence or absence of 3-MA. LC3-I and LC3-II were quantified by densitometric analysis of the blots and a ratio of LC3-II to LC3-I was calculated. The data are the means  $\pm$  SD of 3 independent experiments. Significance compared to untreated cells was determined by ANOVA and is represented by asterisks (\* $p < 0.05$ ; \*\*  $p < 0.01$ ; \*\*\*  $p < 0.001$ ; \*\*\*\*  $p < 0.0001$ ).

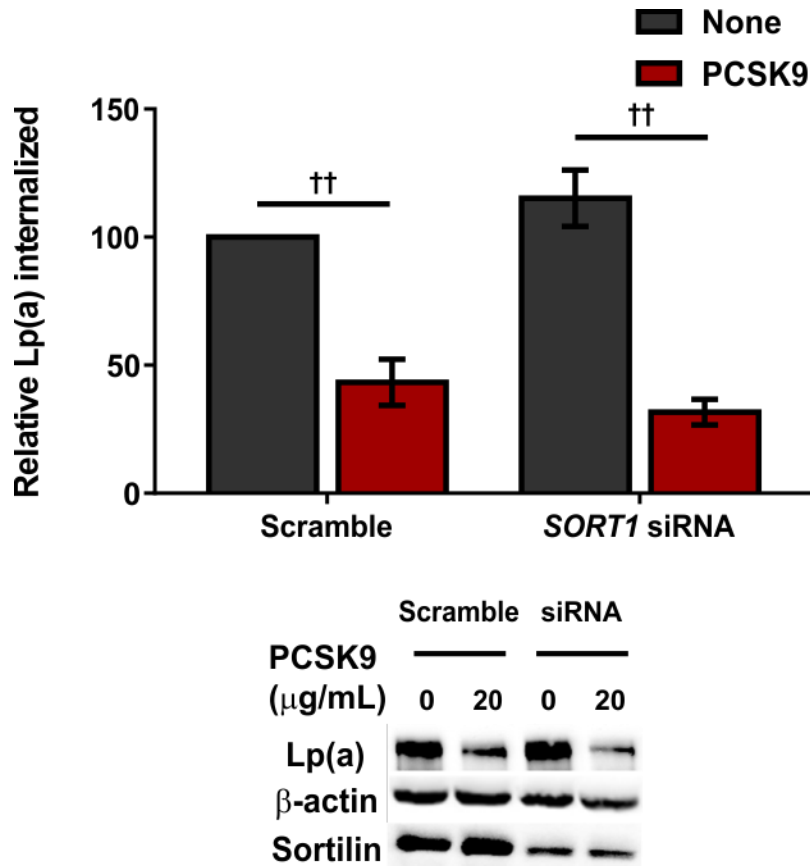

**Figure S5. Knockdown of sortilin expression does not alter Lp(a) internalization by HepG2 cells.** Cells were transiently transfected with an siRNA against *SORT1* or a scrambled siRNA, as indicated. Cells were grown for 16 hours in LPDS media and subsequently incubated for 4 hours with 10 µg/mL Lp(a). The cells were extensively washed, and lysates were subjected to western blot analysis to determine the amount of Lp(a) internalized. The data shown are normalized using the β-actin signal as an internal control and correspond to the means ± SEM of at least 3 independent experiments. Significance compared to *SORT1* or scrambled siRNA was determined using an unpaired Students' t-test, and is indicated by daggers (†† $p < 0.01$ ).



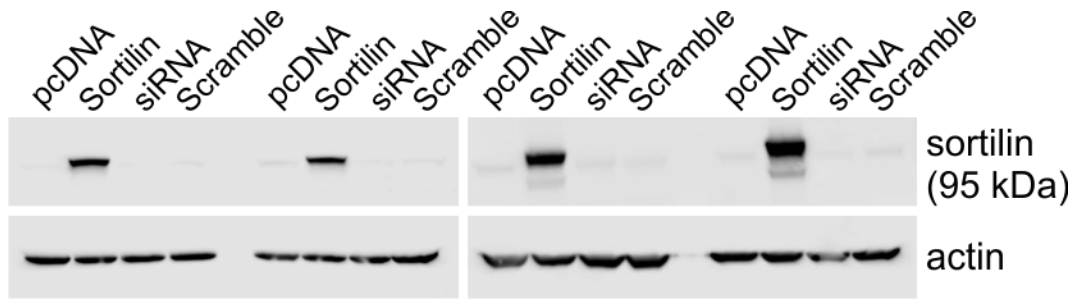

**Figure S6. Overexpression and siRNA-mediated knockdown of sortilin.** HepG2 cells stably expressing 17K apo(a) were subjected to a pulse-chase protocol to measure the rate of apo(a) secretion. A portion of the lysates collected at the last time point were subjected to western blot analysis with anti-sortilin or anti-actin antibodies. The data from four such experiments are shown and are also representative of expression patterns for Lp(a)/17K apo(a) internalization experiments.
